# Supplementary material for: Sonic Hedgehog acts as a macrophage chemoattractant during regeneration of the gastric epithelium
Source: PubMed Central journal article supplement (PMC8755719; doi:10.1038/s41536-021-00196-2), 2022-01-12

# SHH

# CD68

M1                    M2                    EpCAM<sup>+</sup> (M1)    EpCAM<sup>+</sup> (M2)

EpCAM<sup>+</sup> (M1)    EpCAM<sup>+</sup> (M2)    M1                    M2

∩ > I I<sup>+</sup> > I I<sup>+</sup> ∩ > I I<sup>+</sup> ∩ > I I<sup>+</sup>

∩ > I I<sup>+</sup> ∩ > I I<sup>+</sup> ∩ > I I<sup>+</sup> ∩ > I I<sup>+</sup>

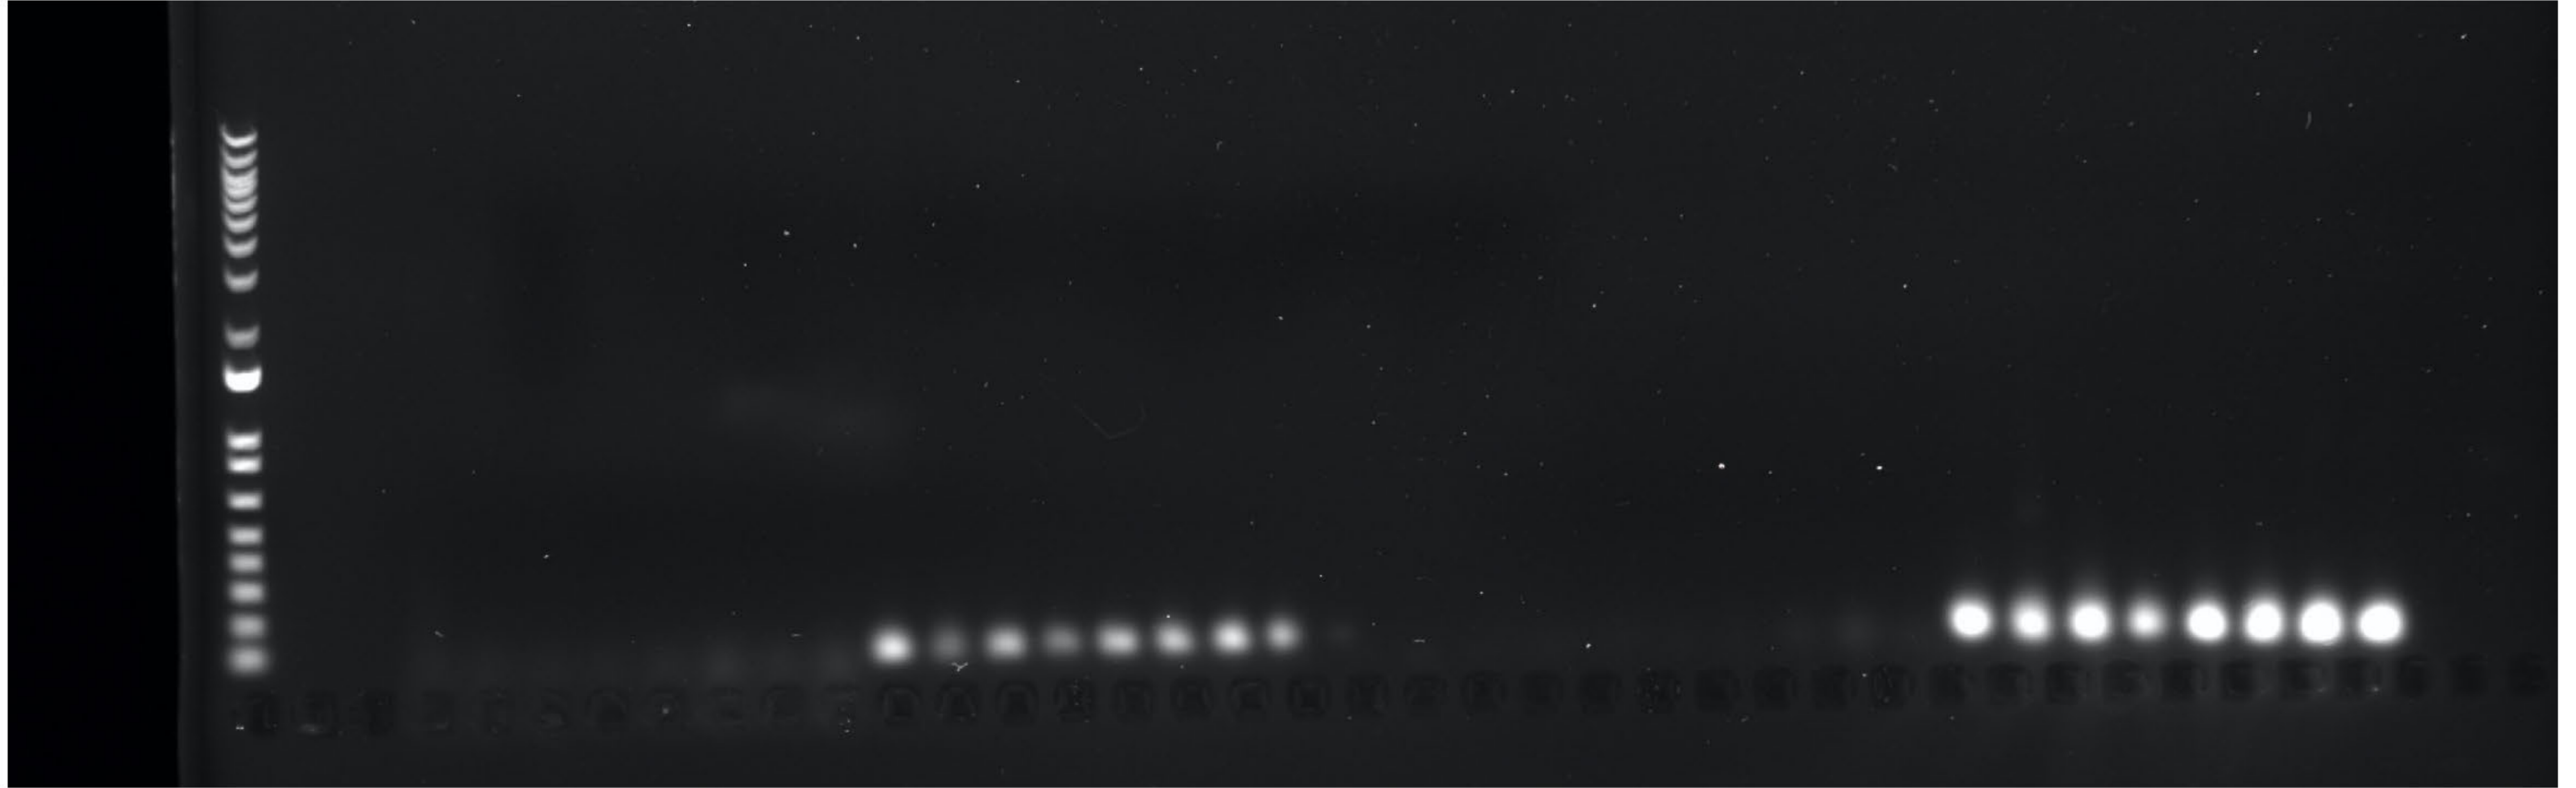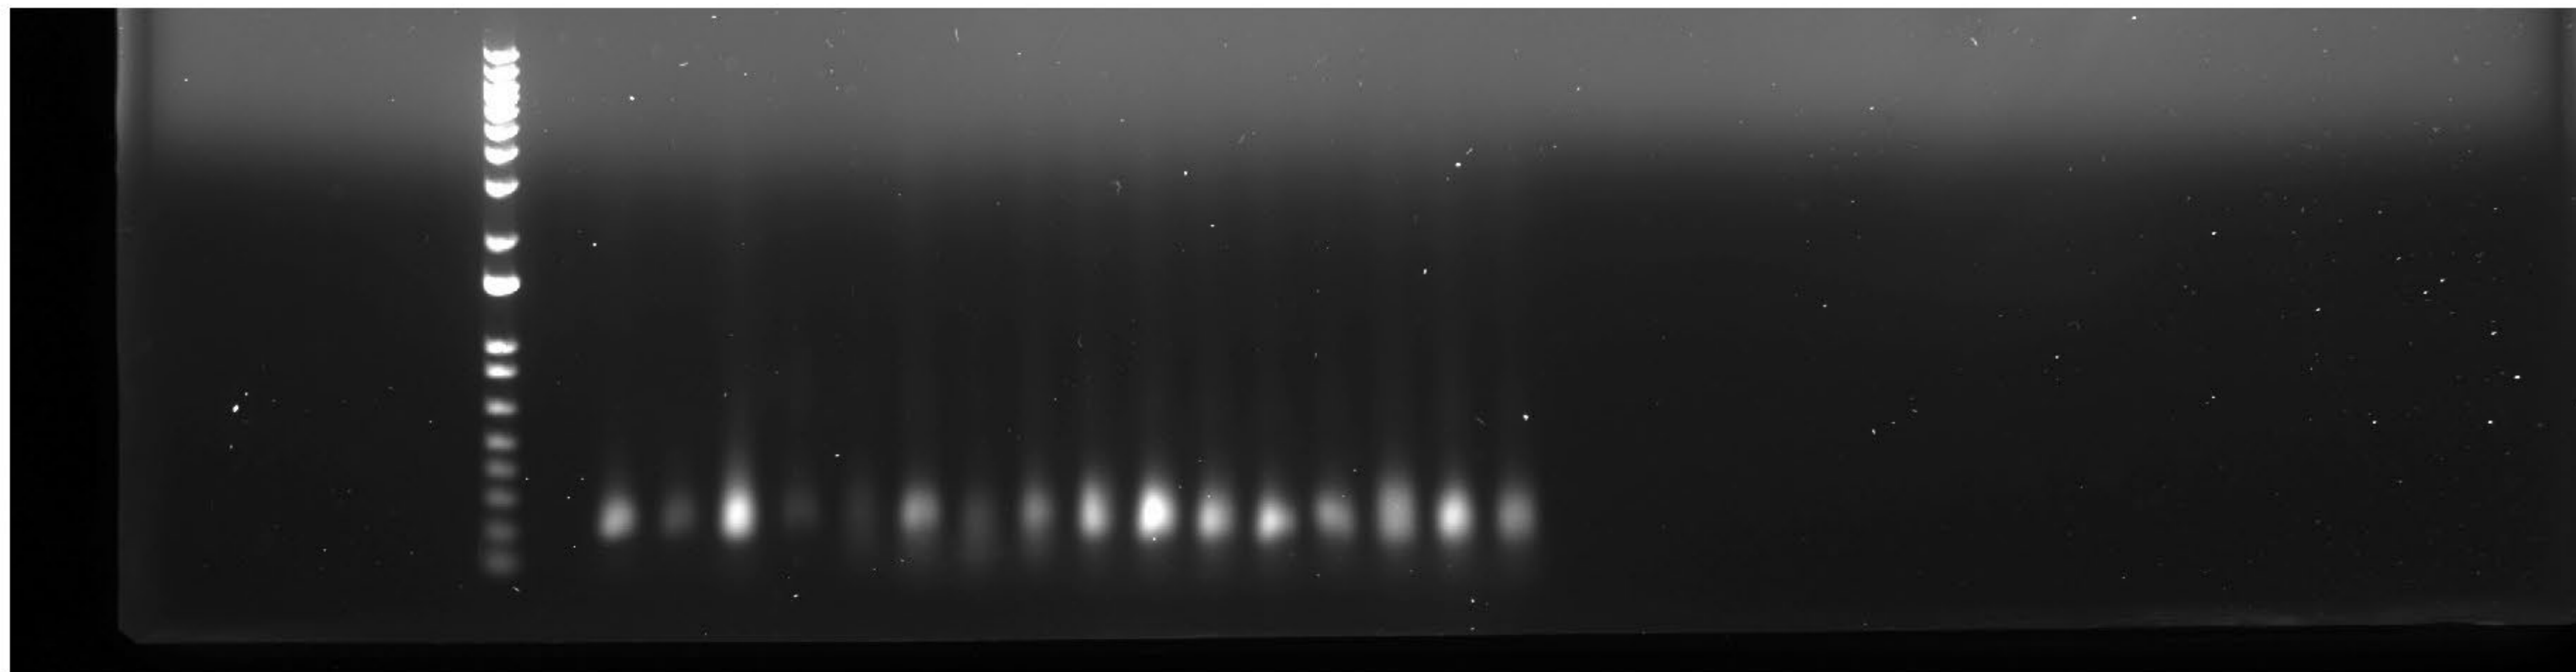

EpCAM<sup>+</sup> M1                    M2                    M2                    EpCAM<sup>+</sup> (M2)

# GAPDH

∩ > I I<sup>+</sup> ∩ > I I<sup>+</sup> ∩ > I I<sup>+</sup> ∩ > I I<sup>+</sup>

## P-AKT (approximately 60kDa)

1. 2. 3. 4. 1. 2. 3. 4. M

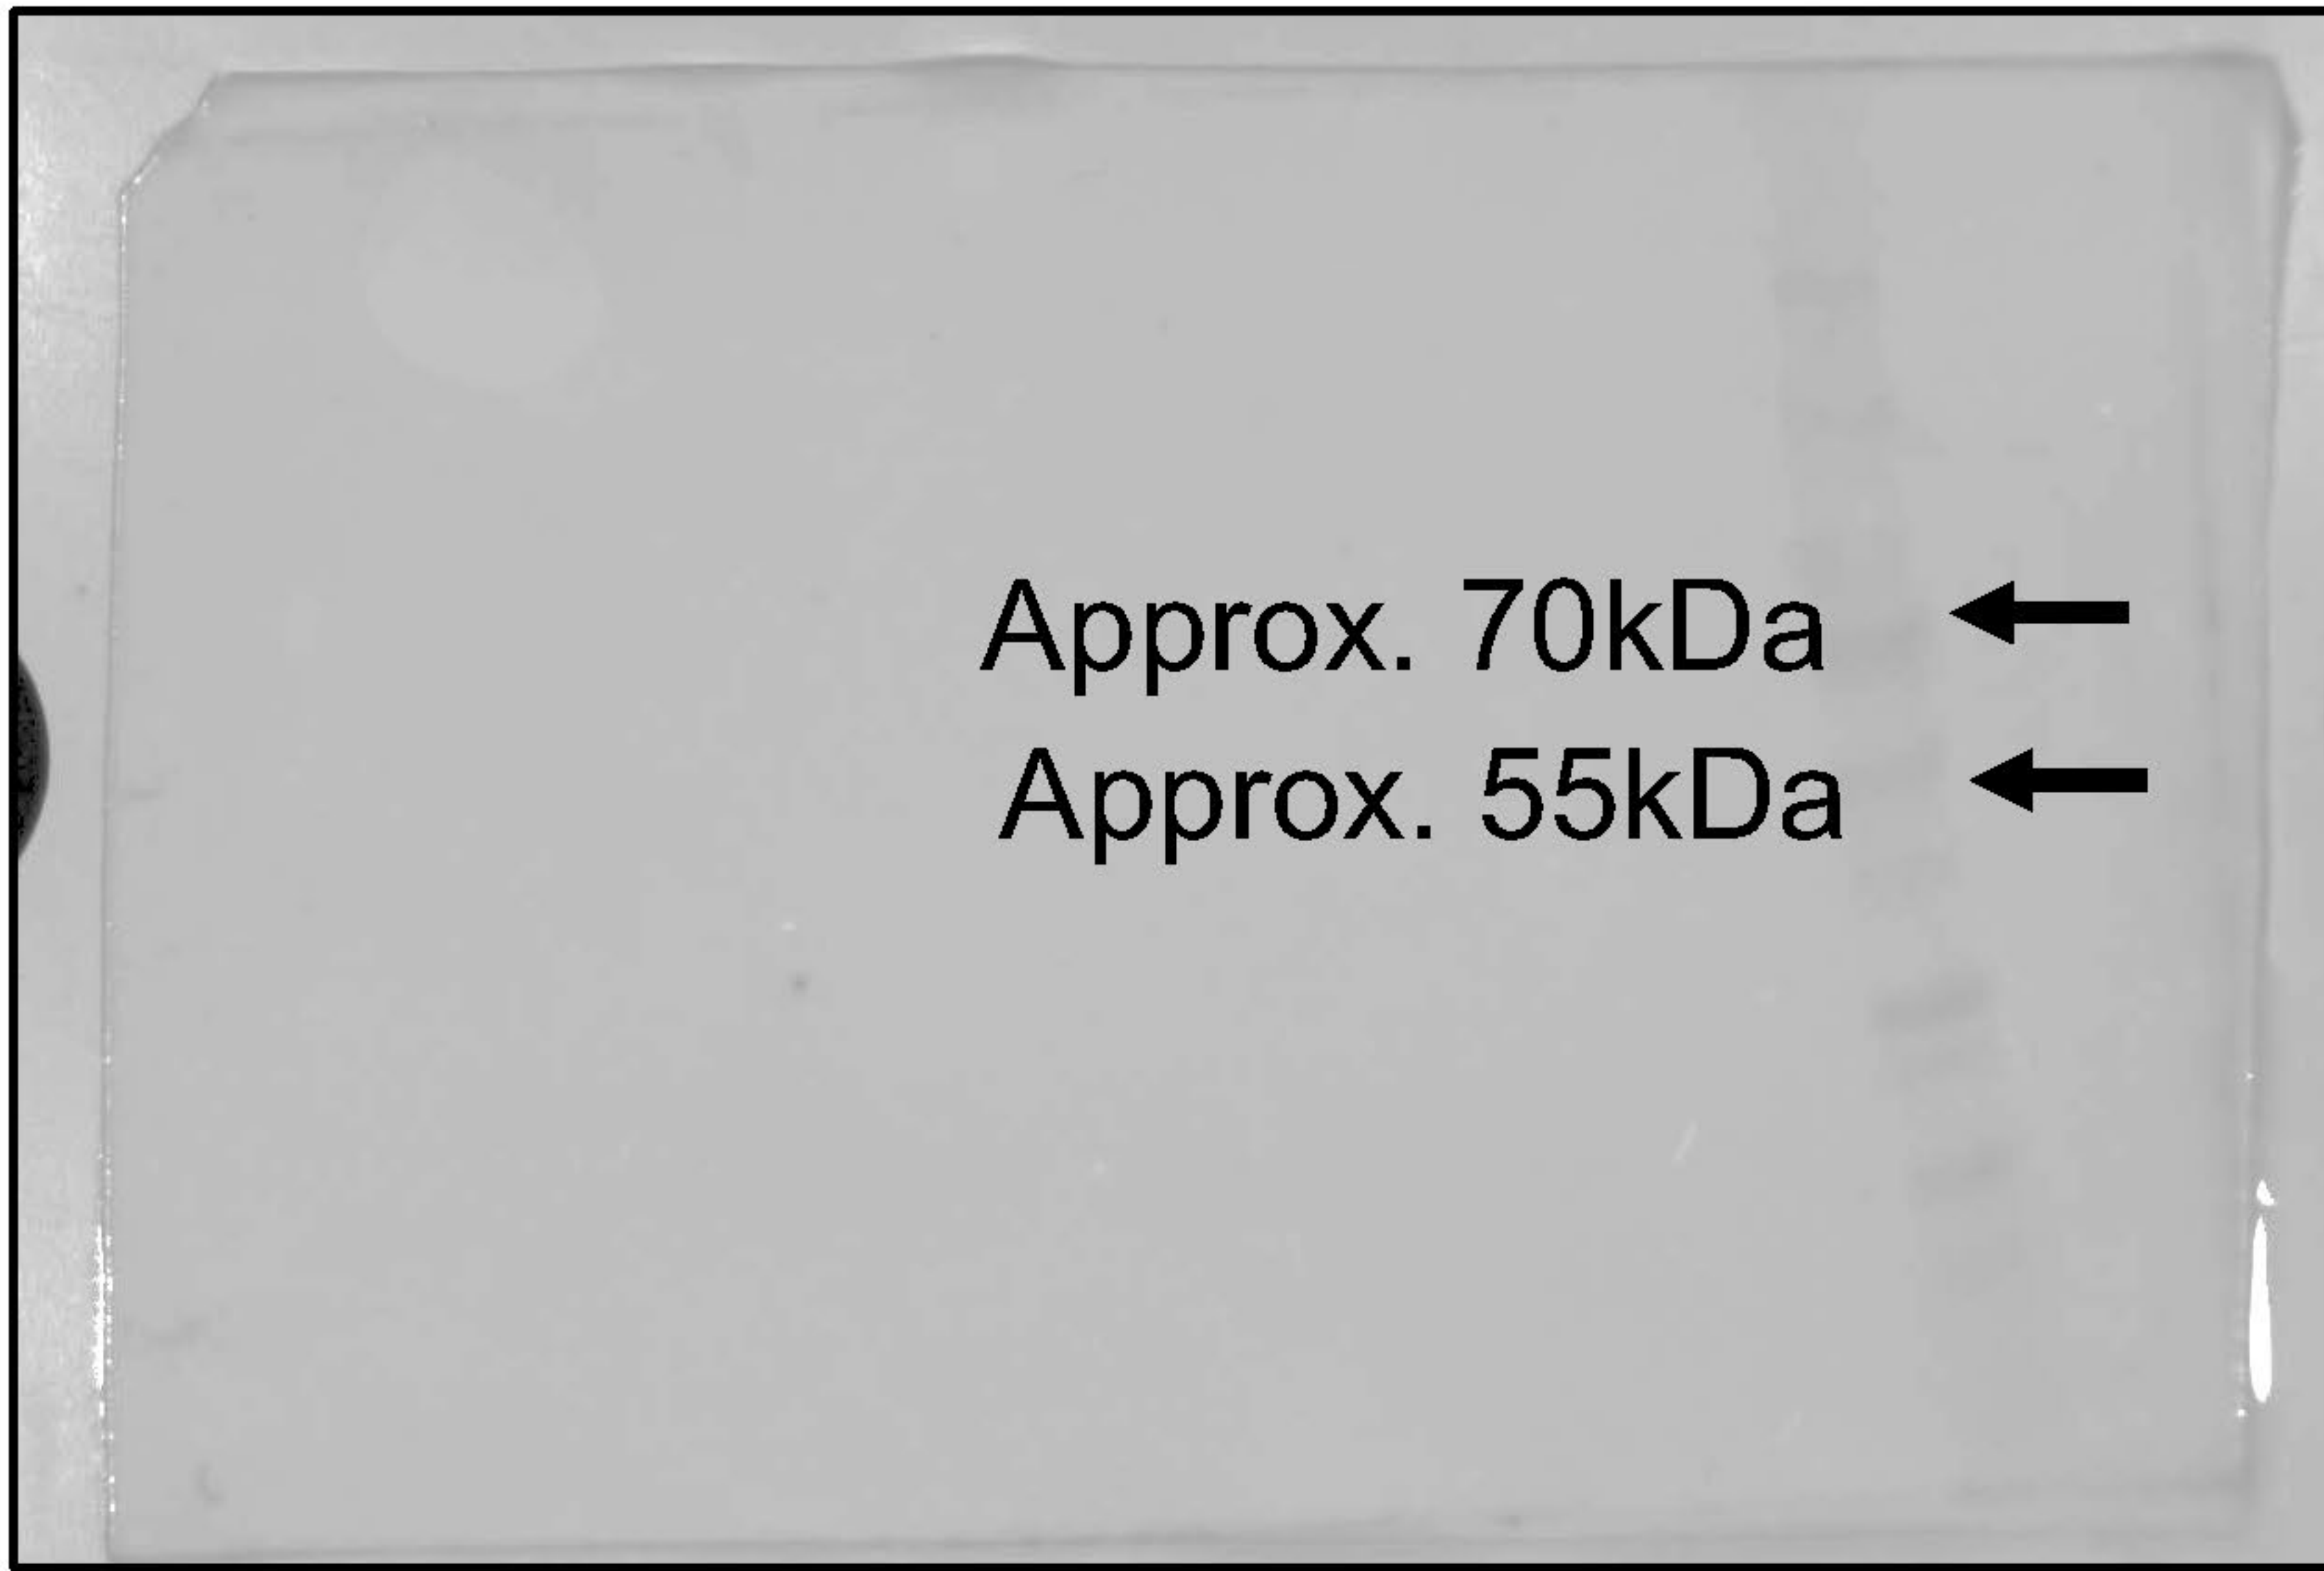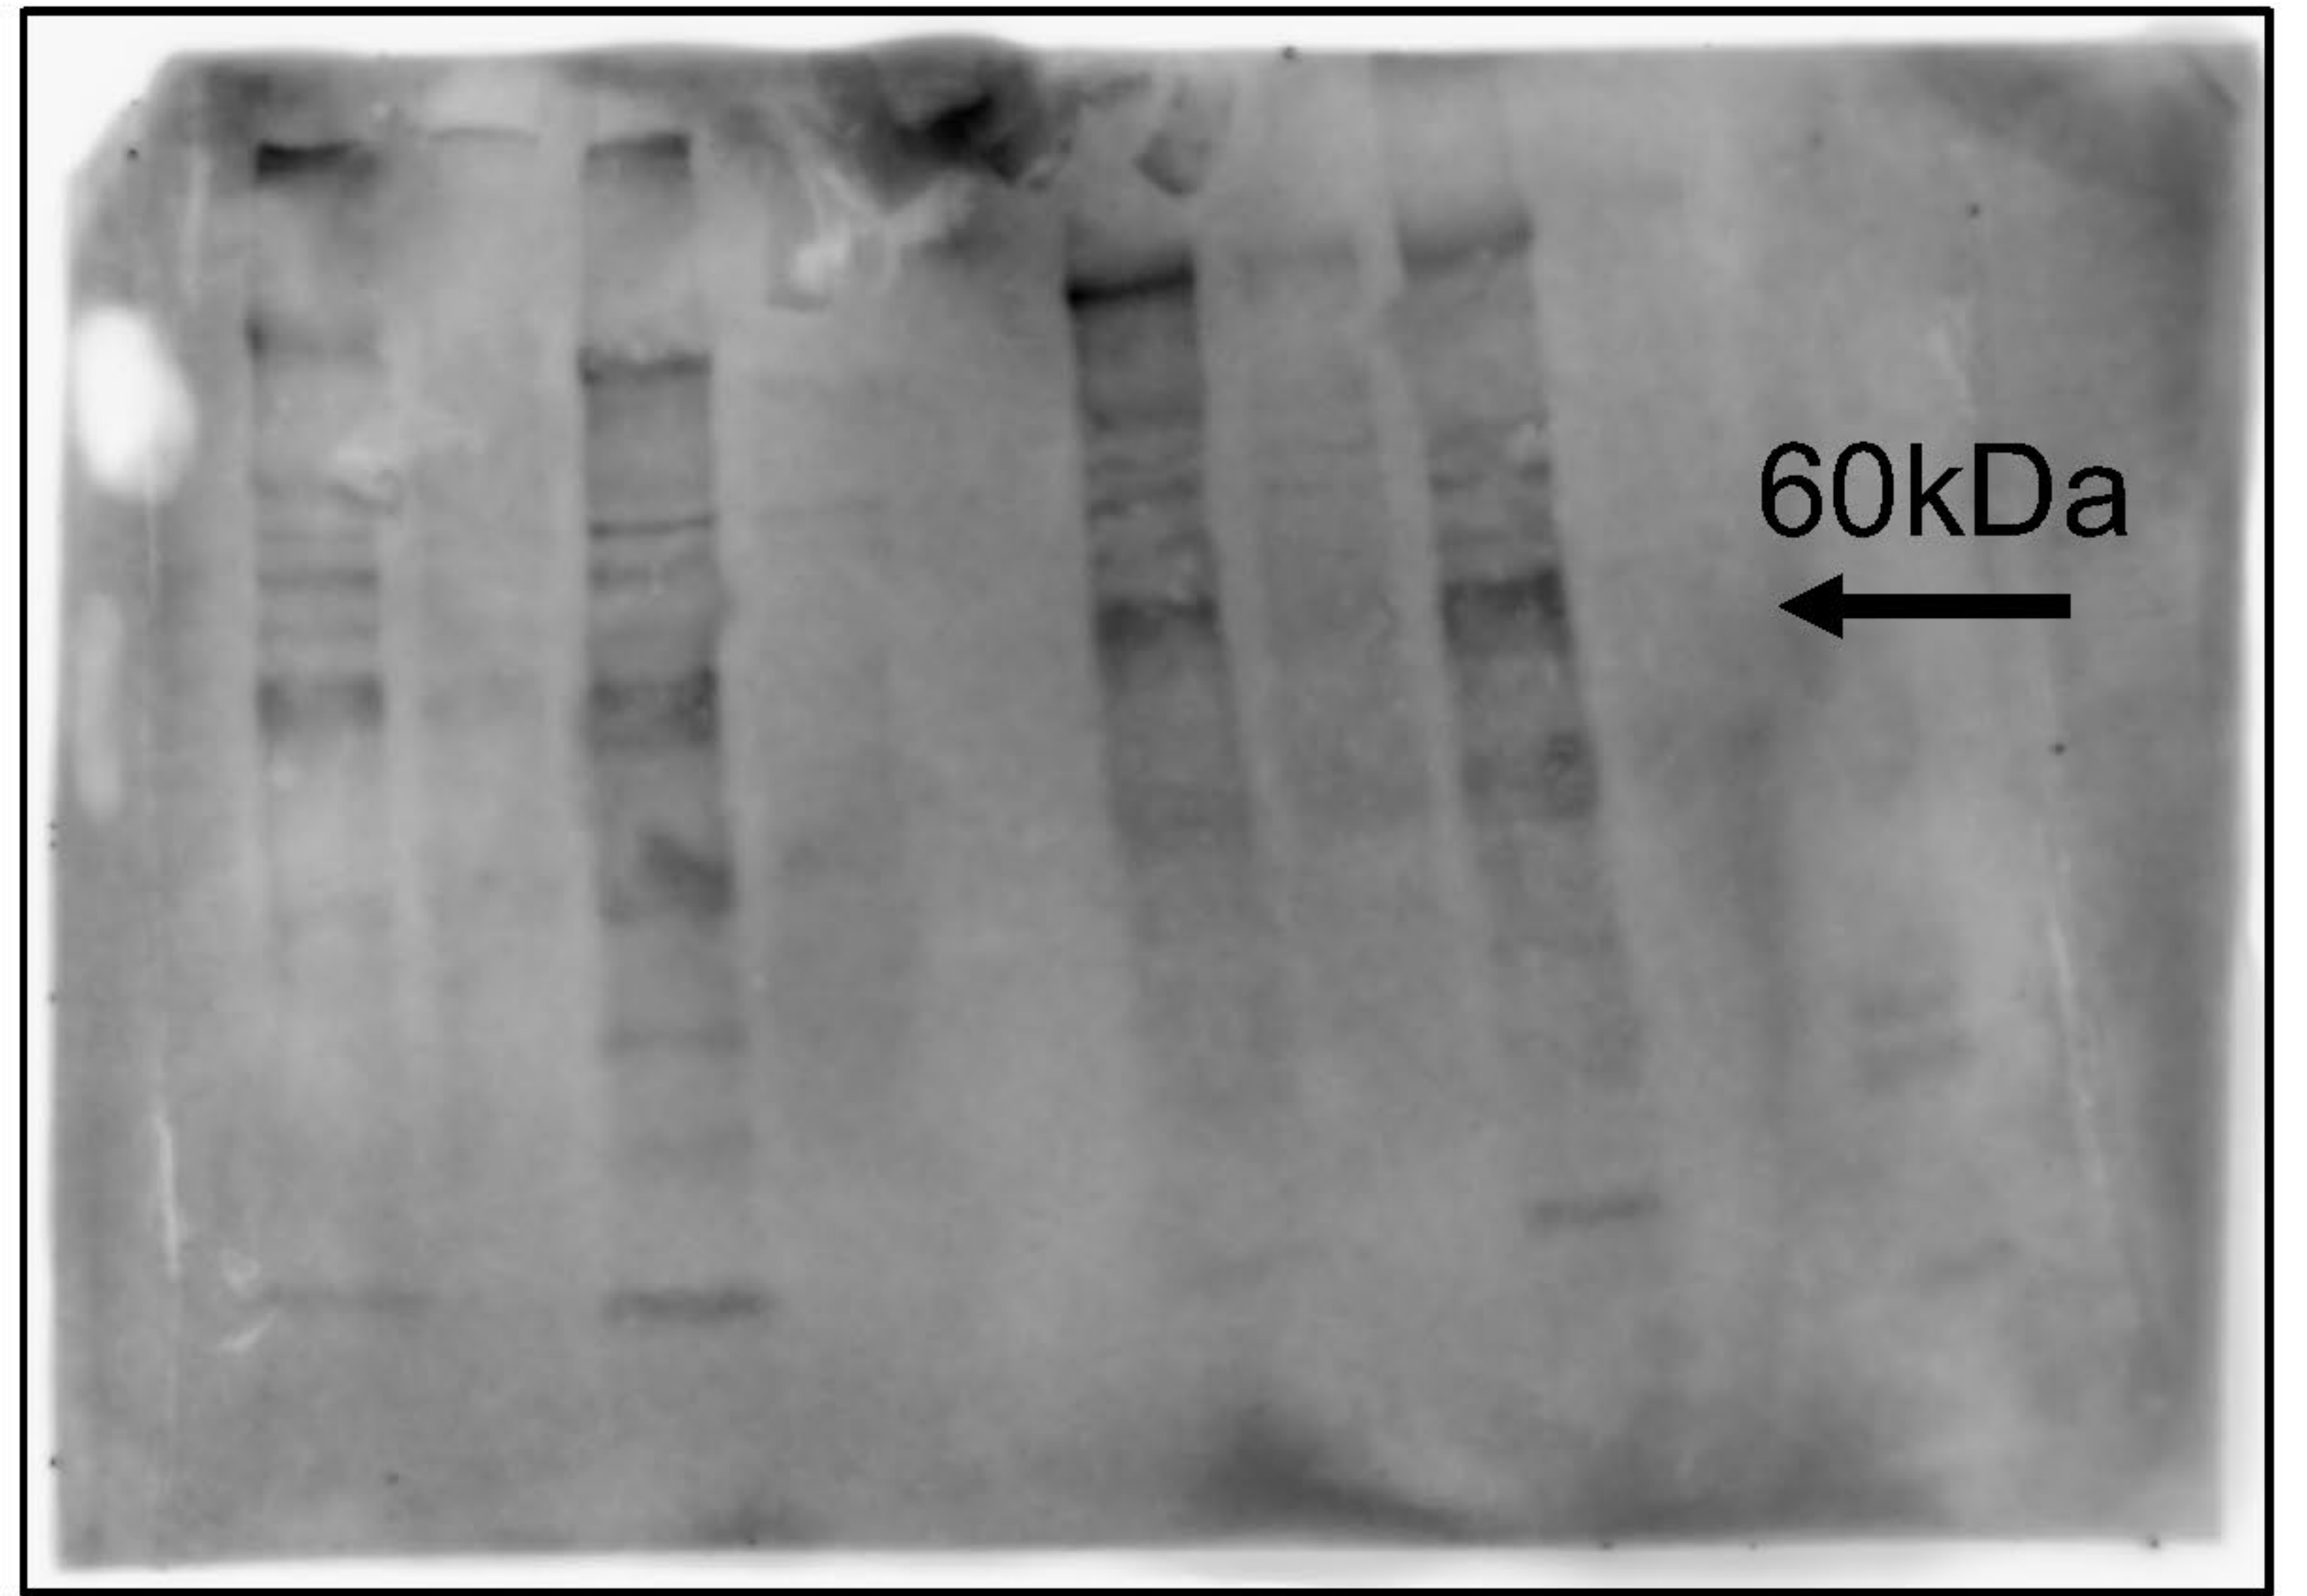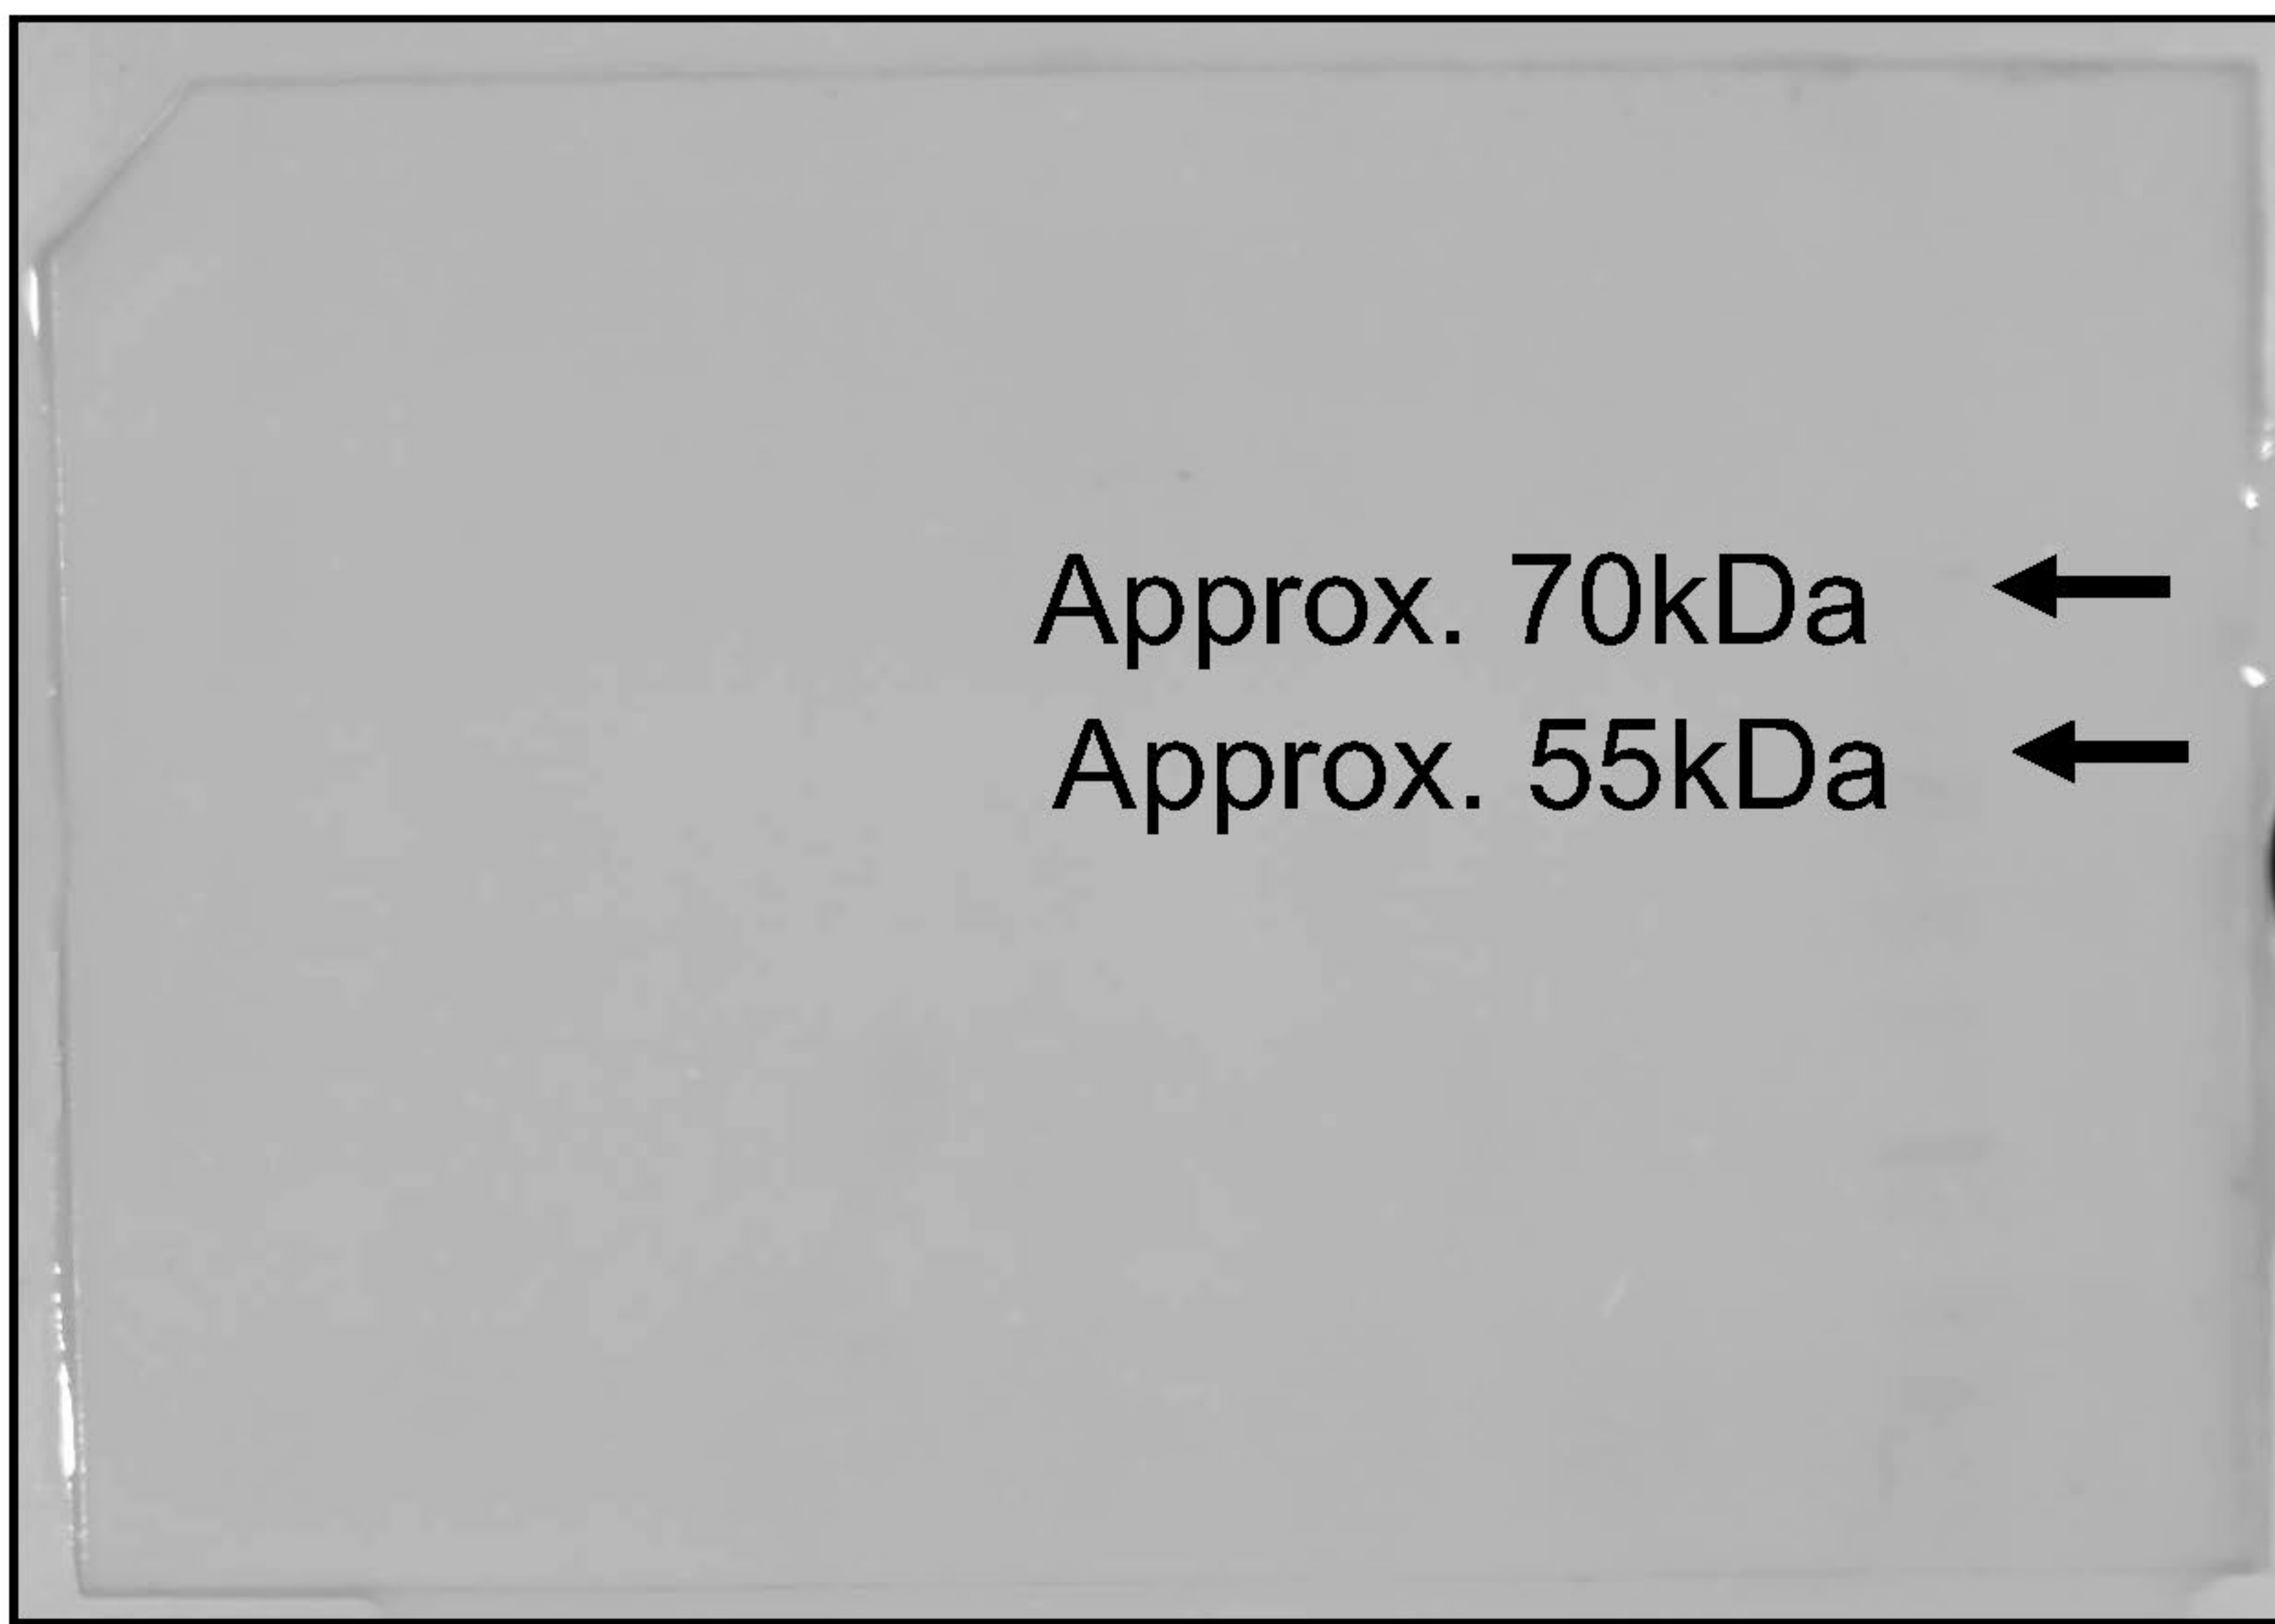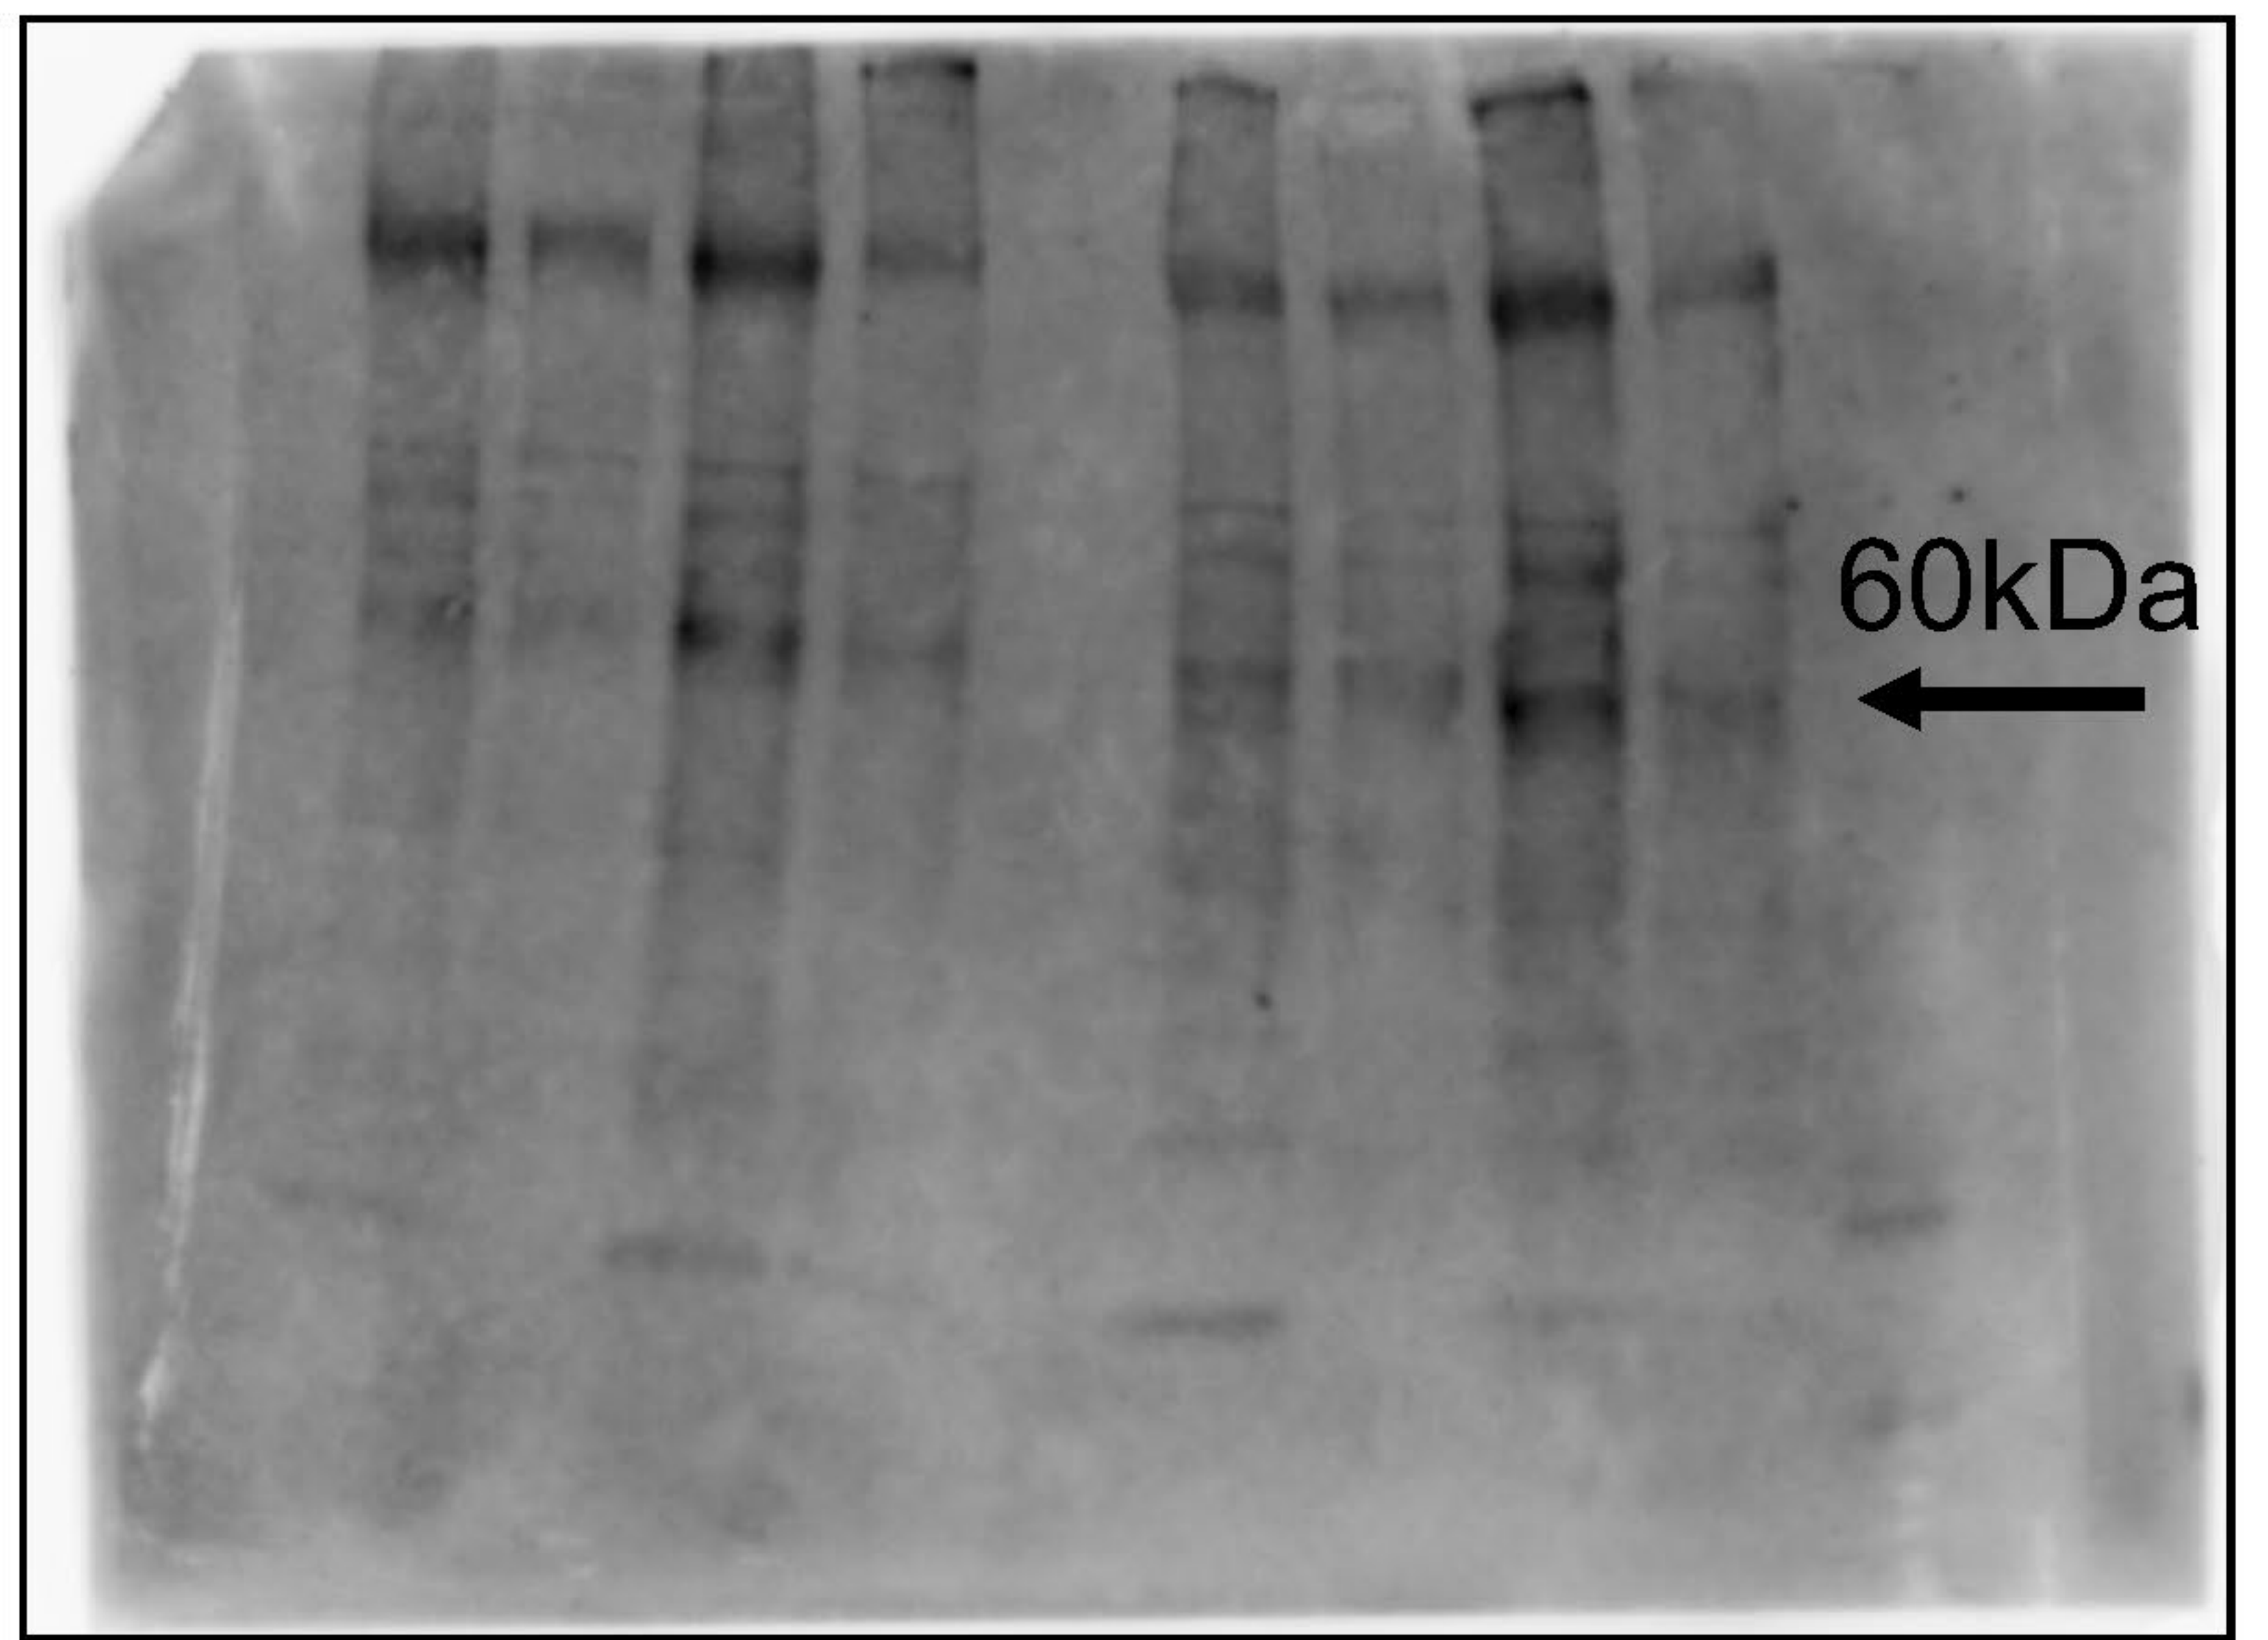

## AKT (approximately 60kDa)

1. 2. 3. 4. 1. 2. 3. 4. M

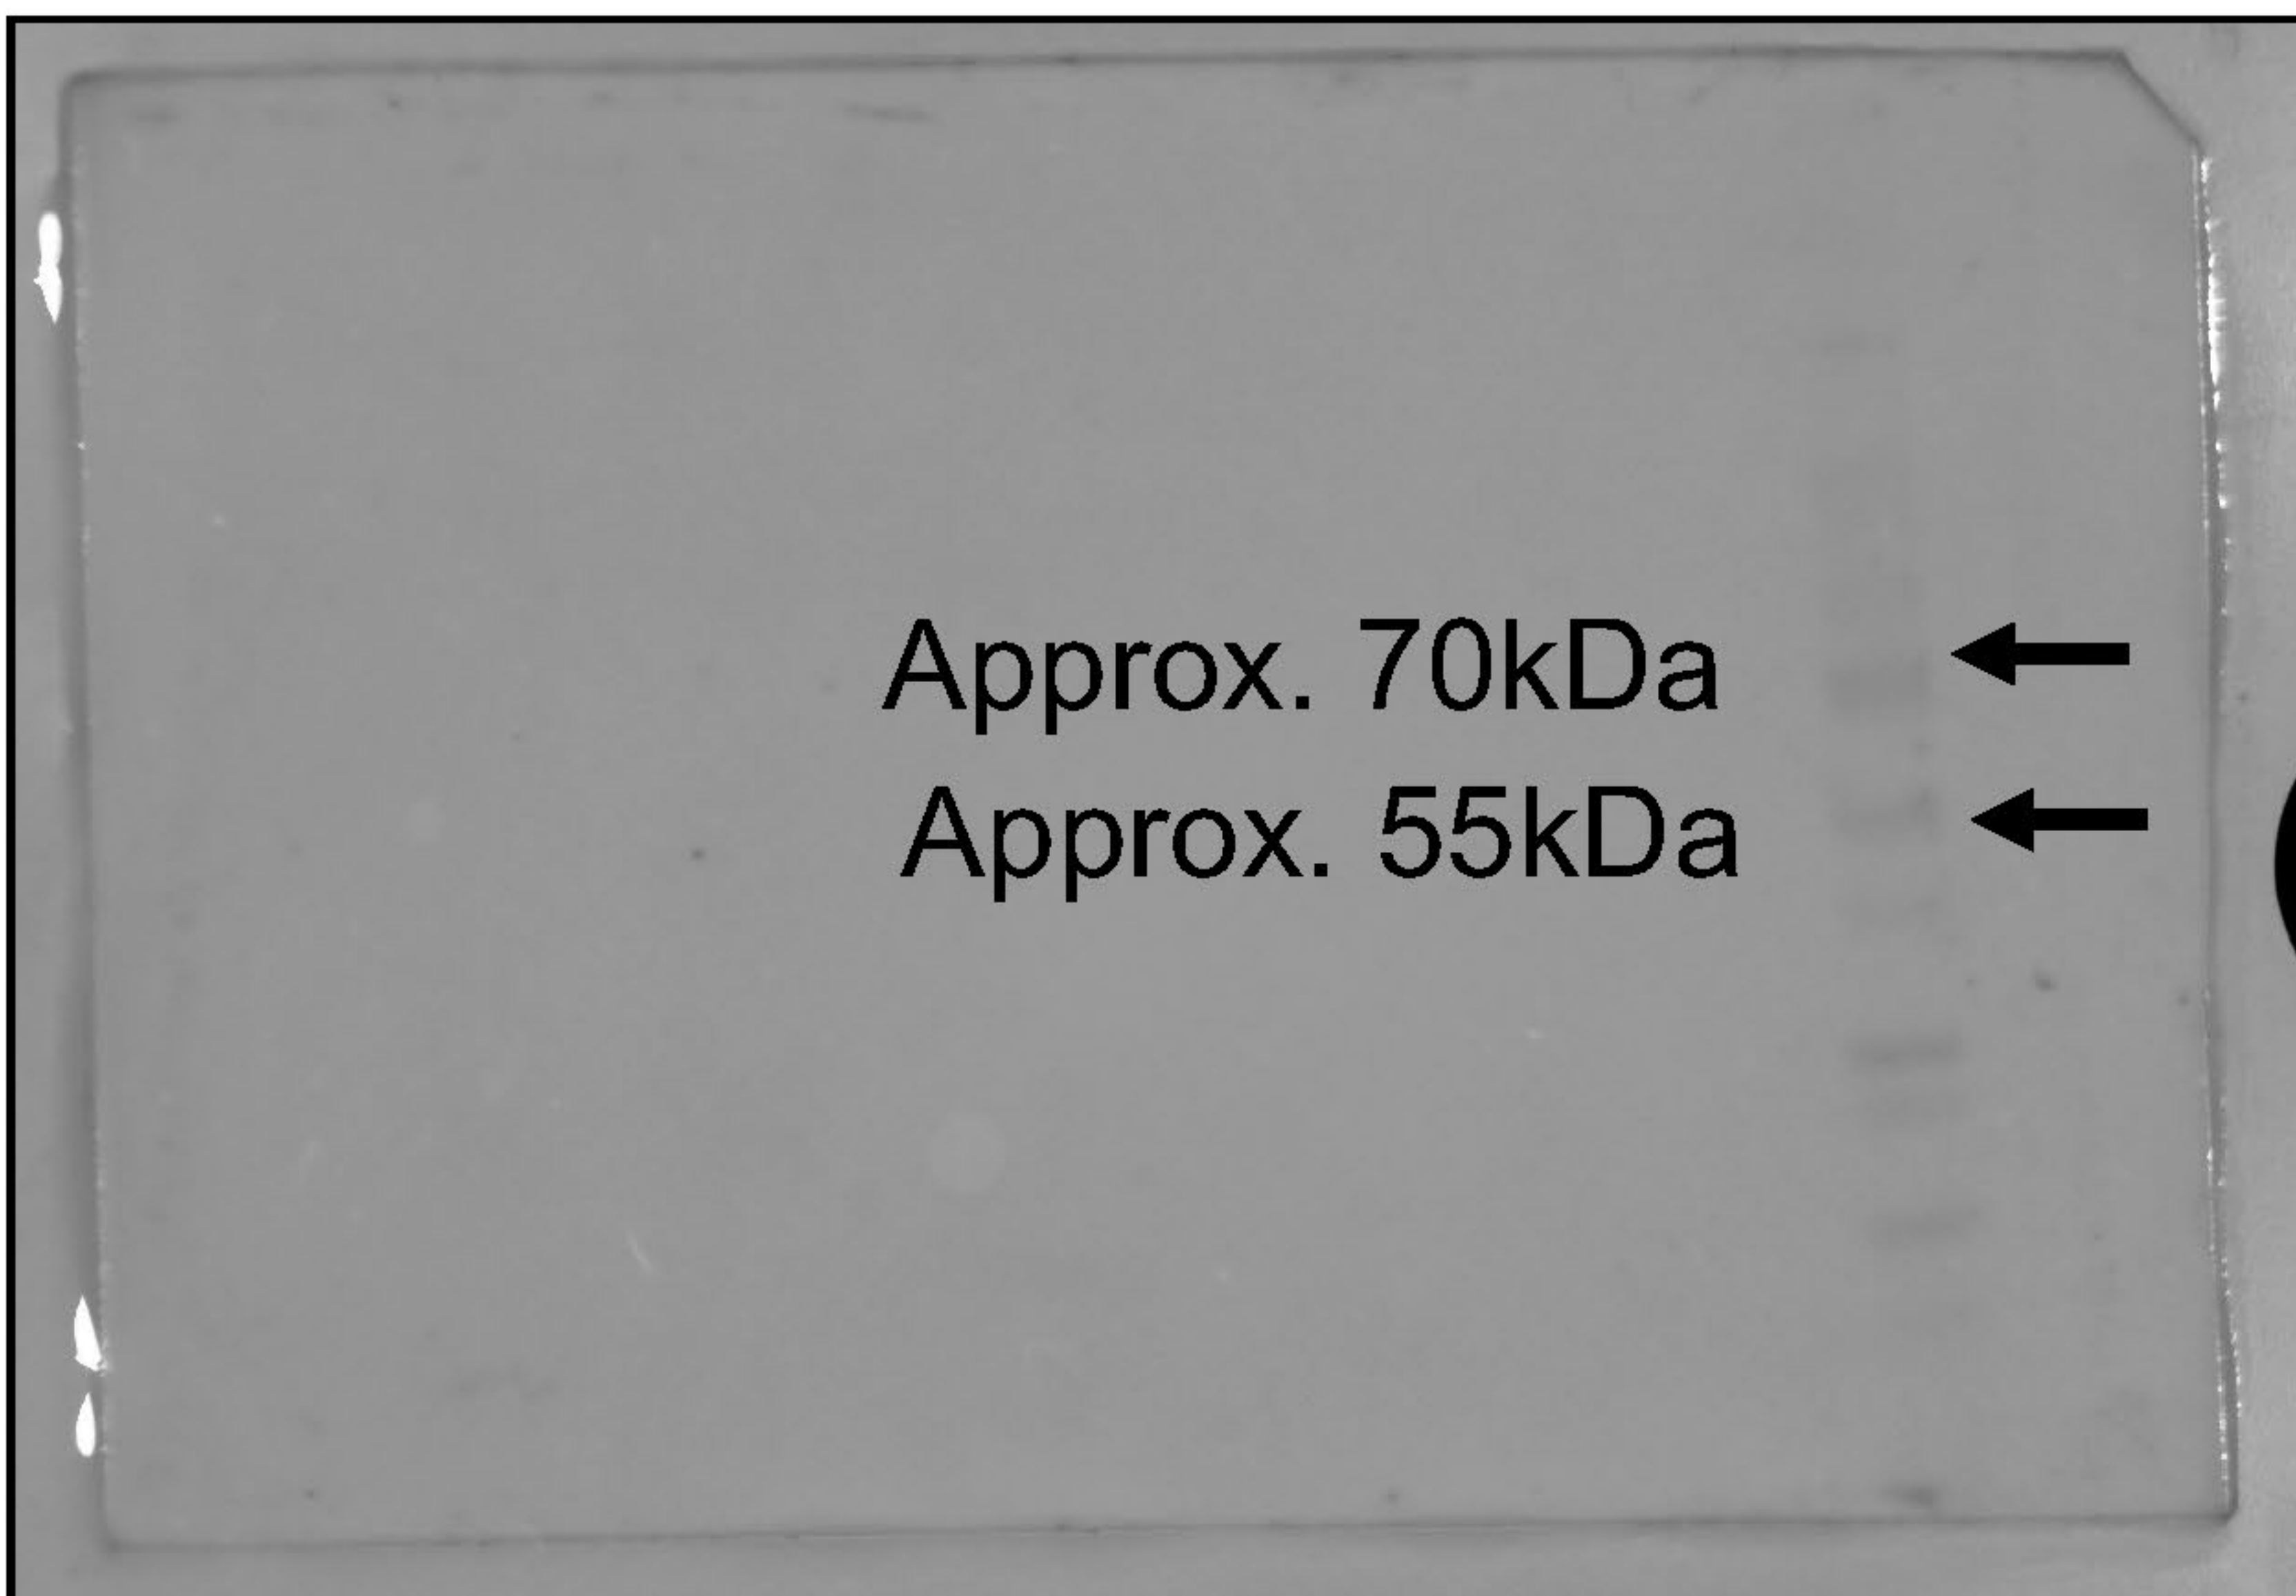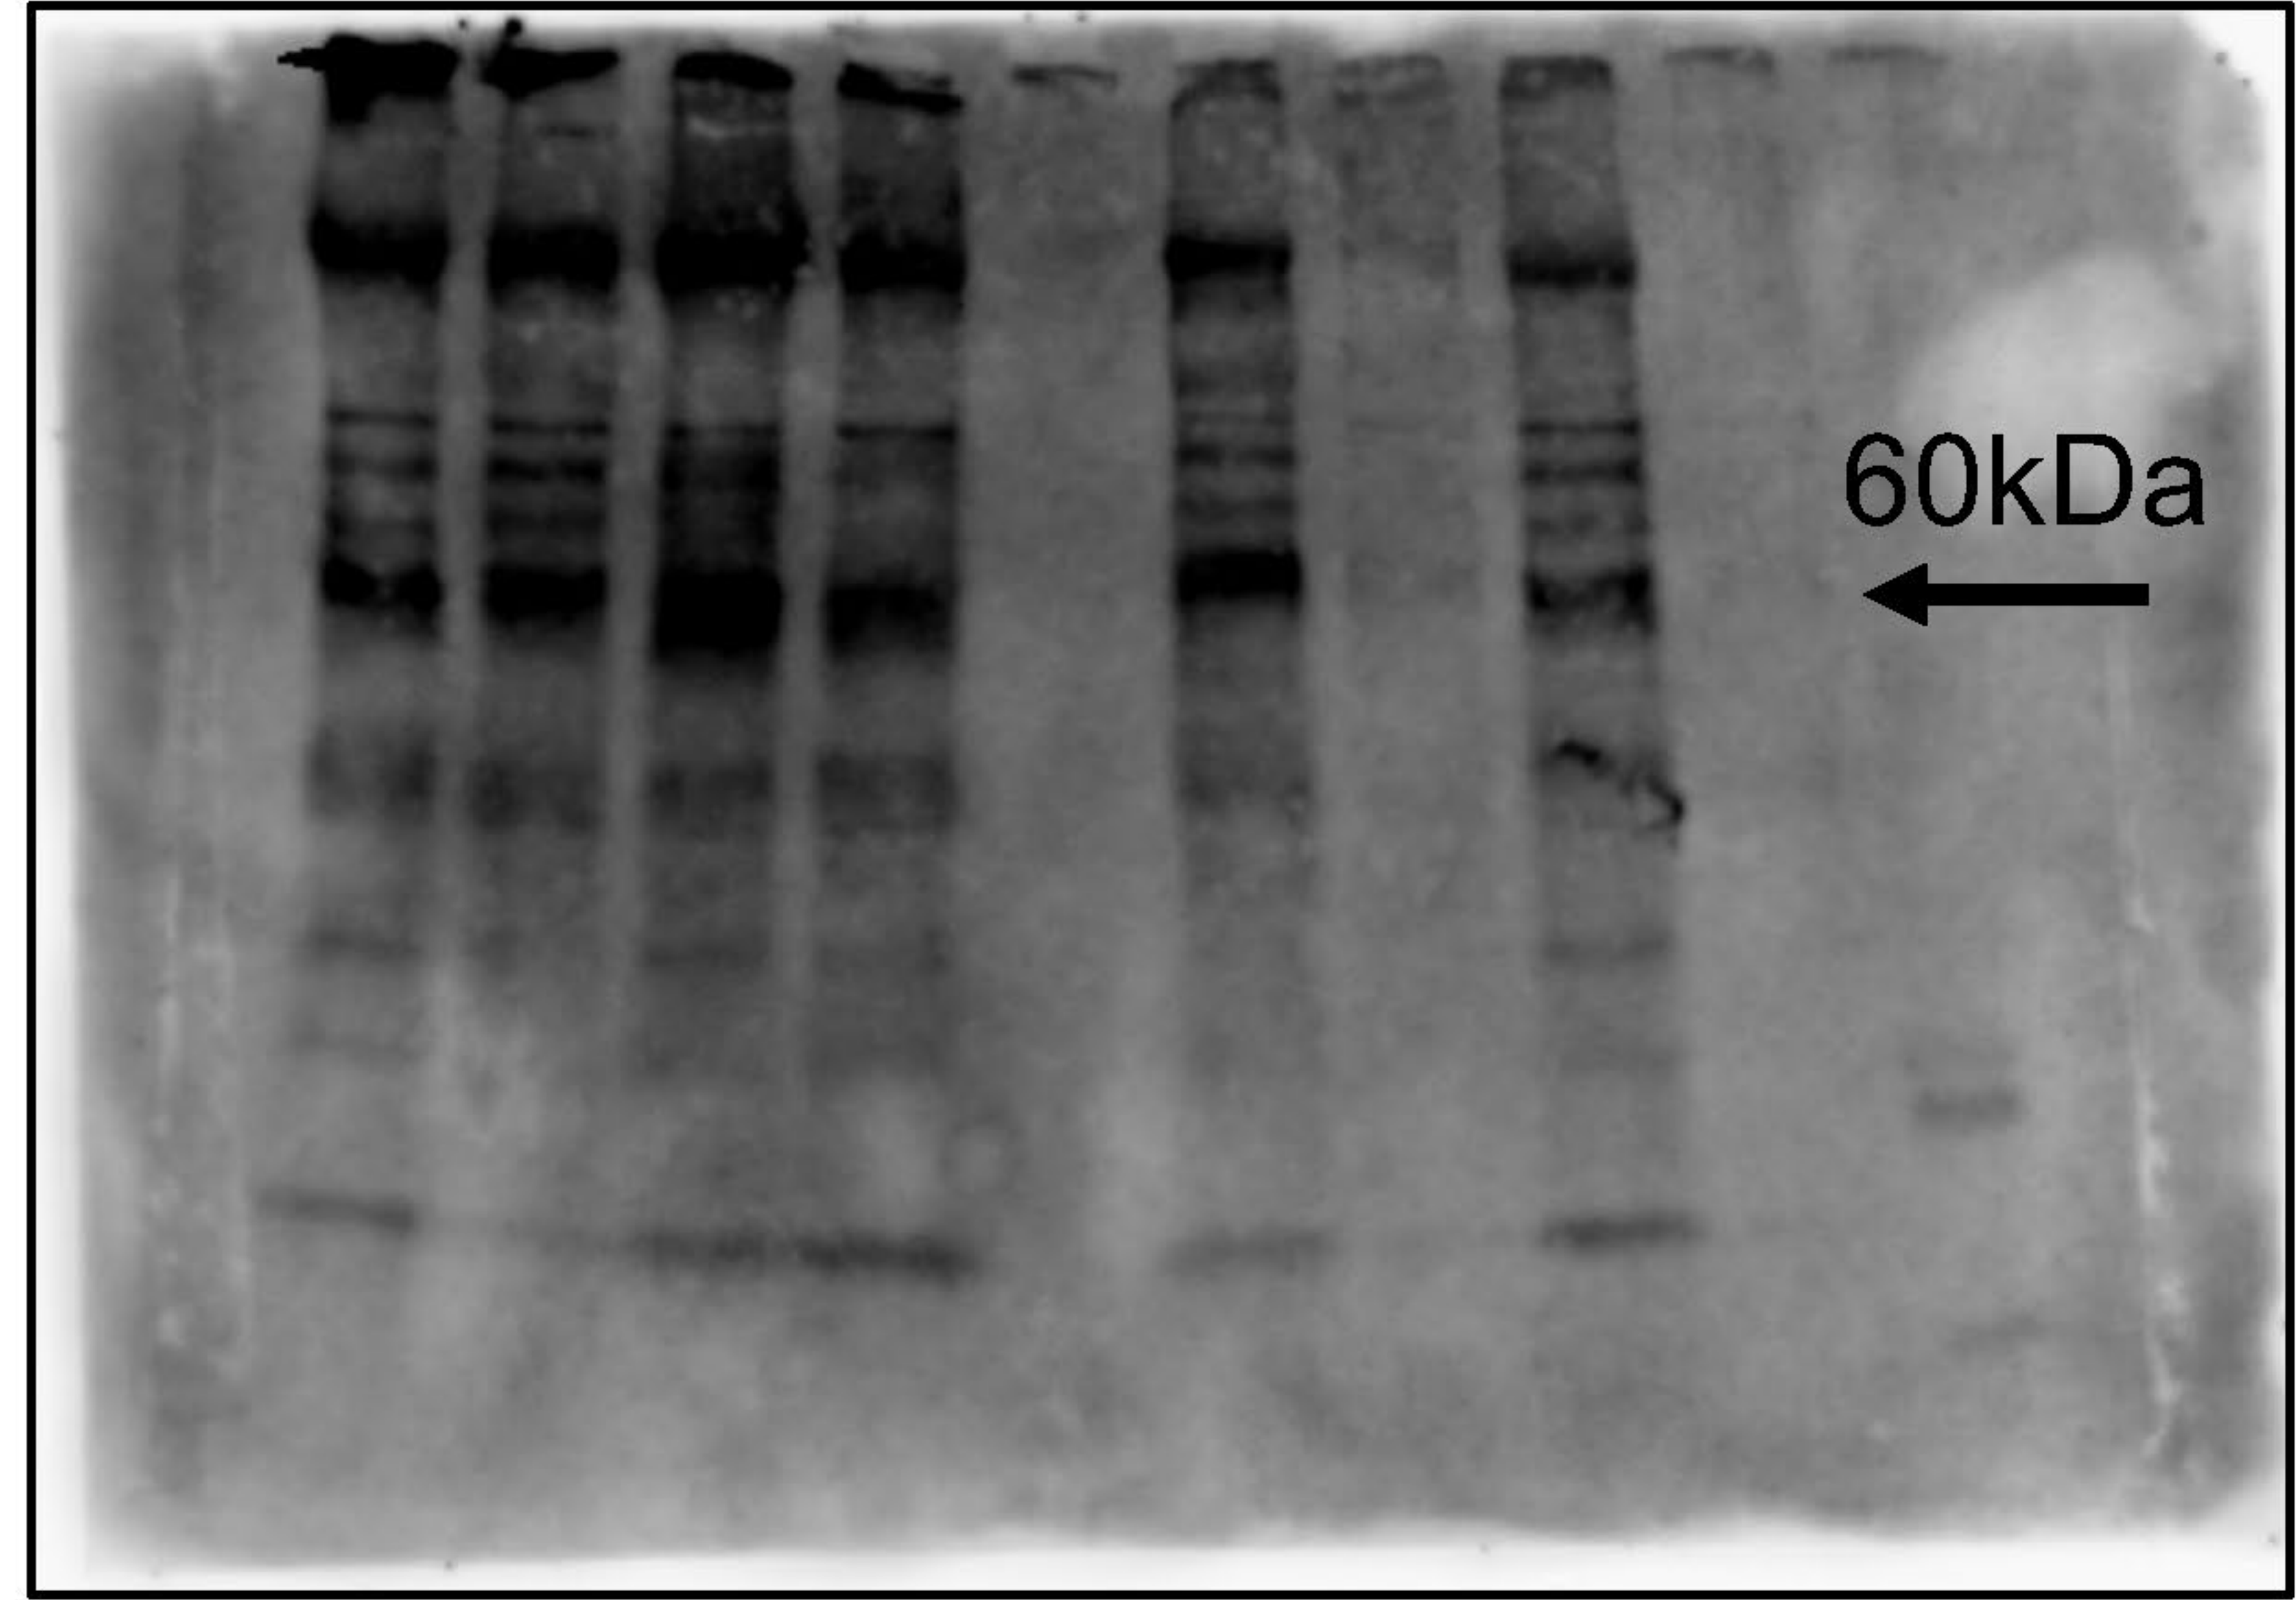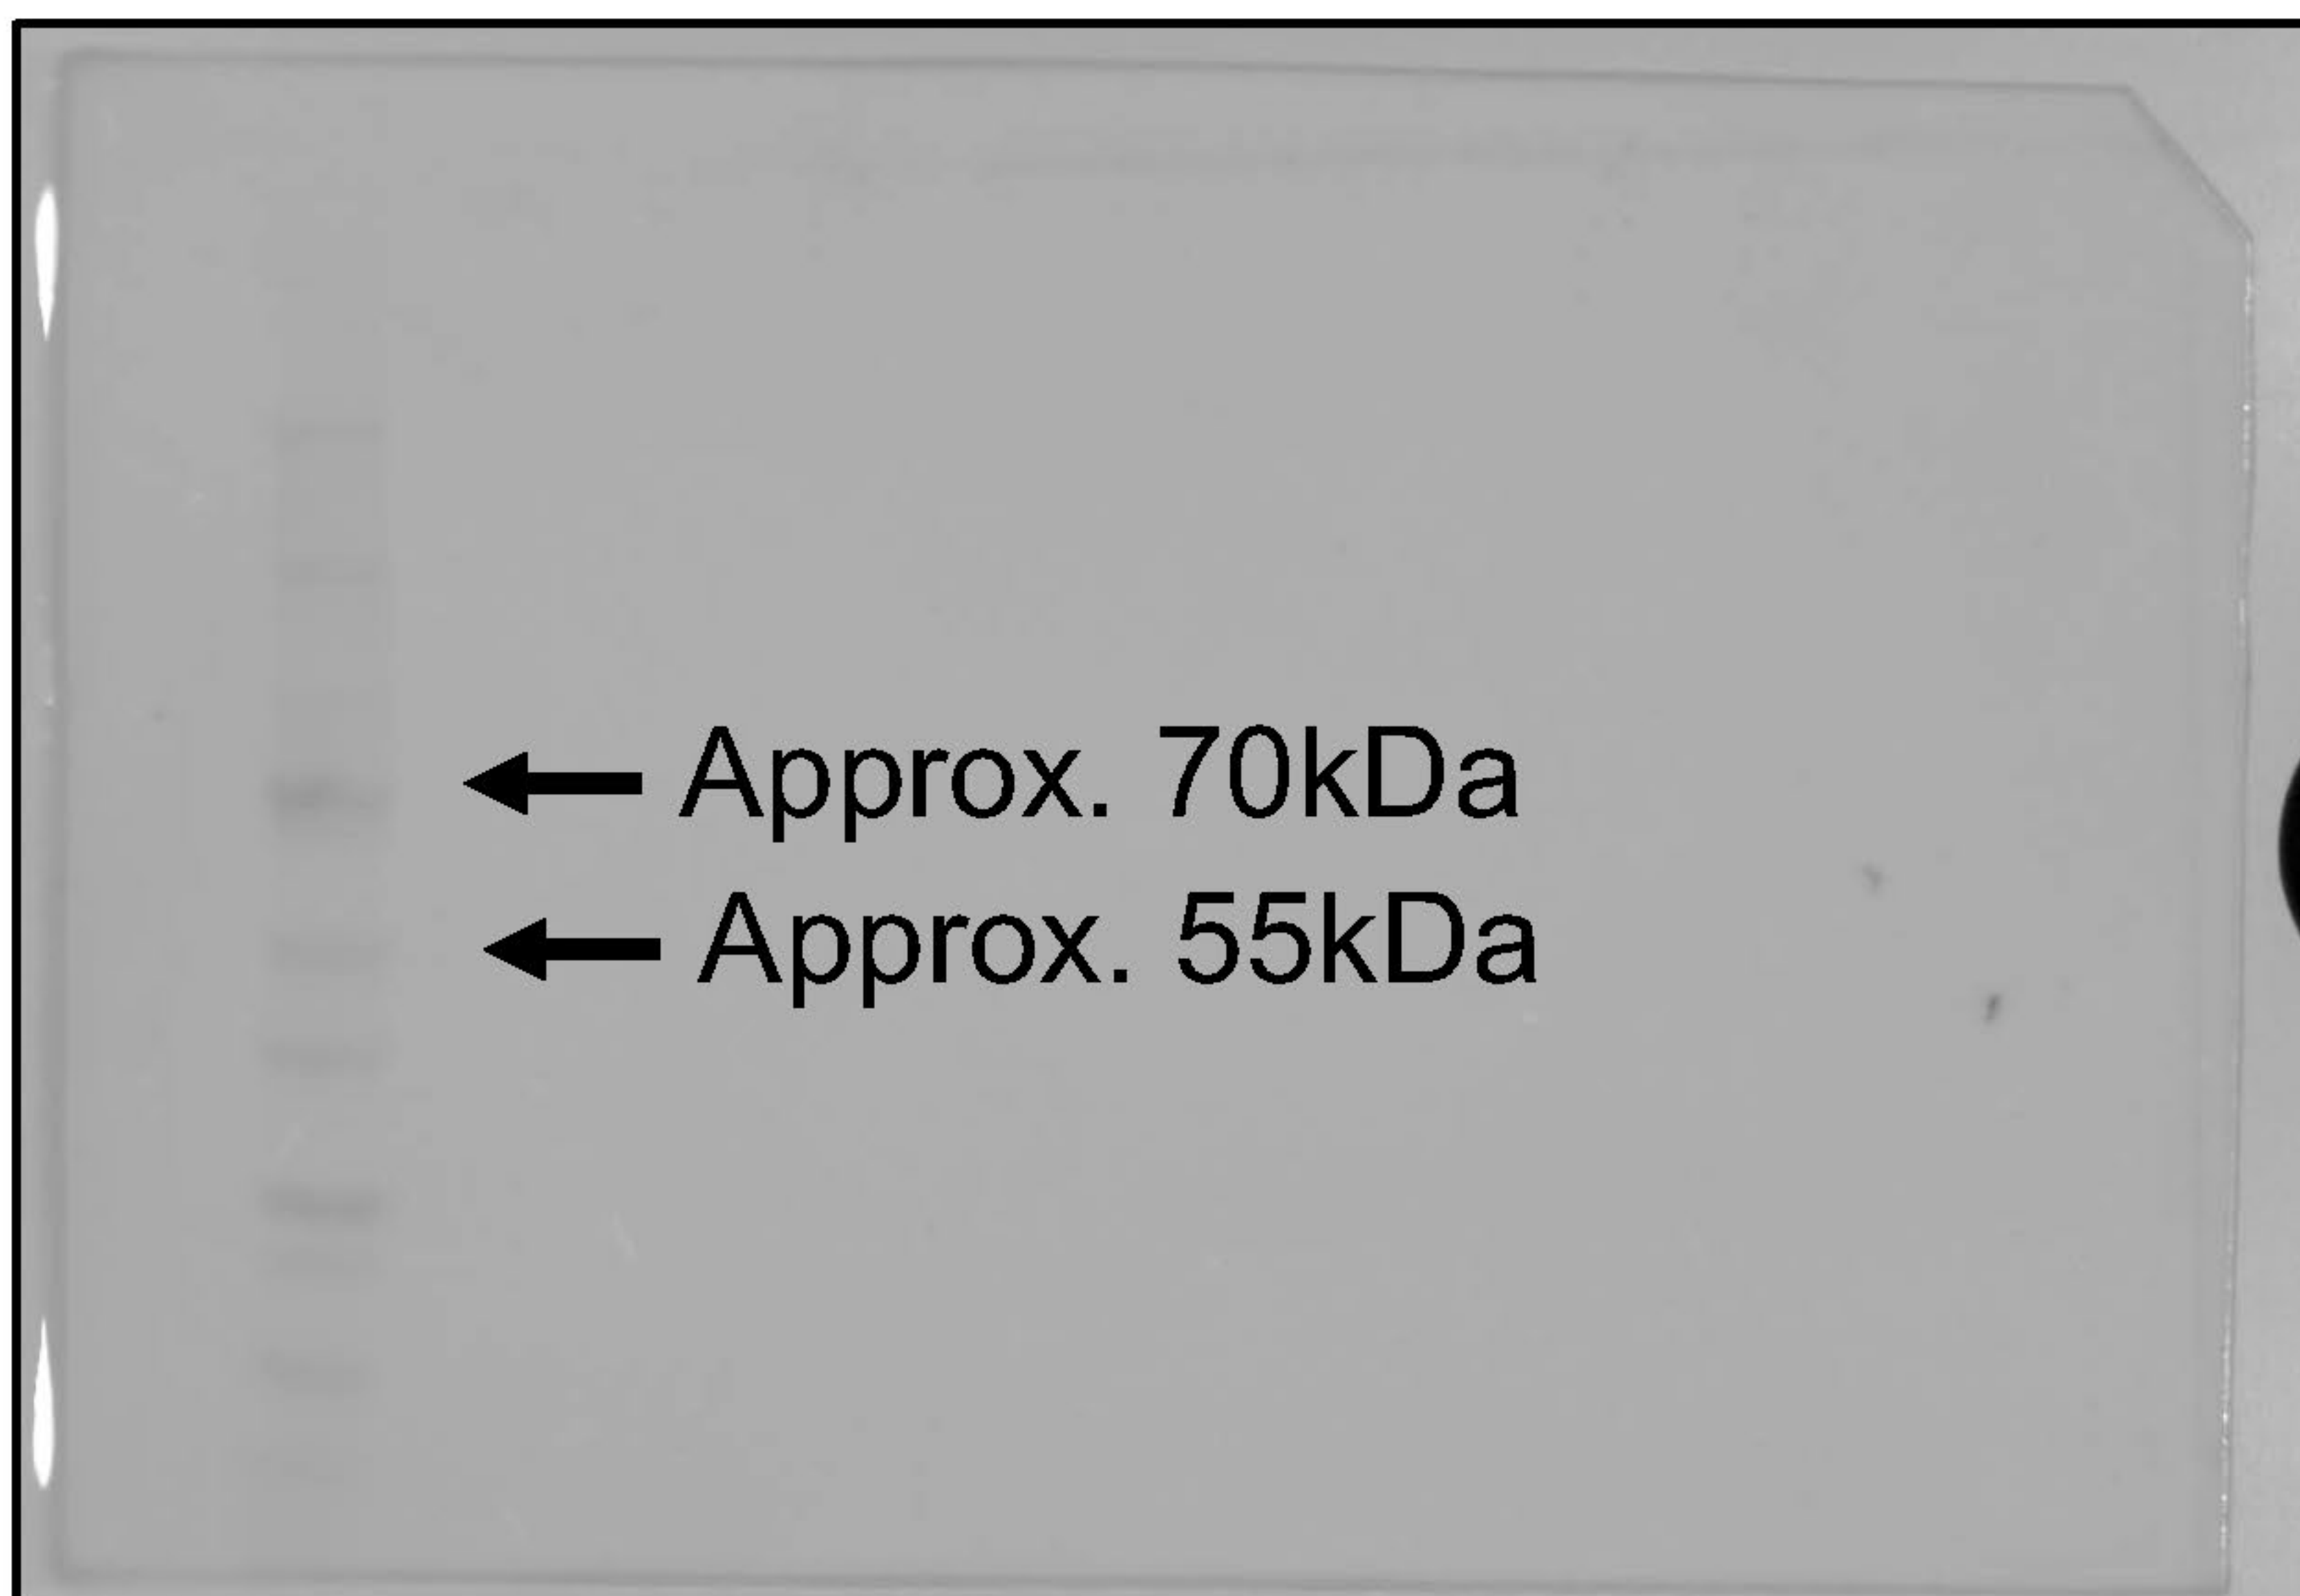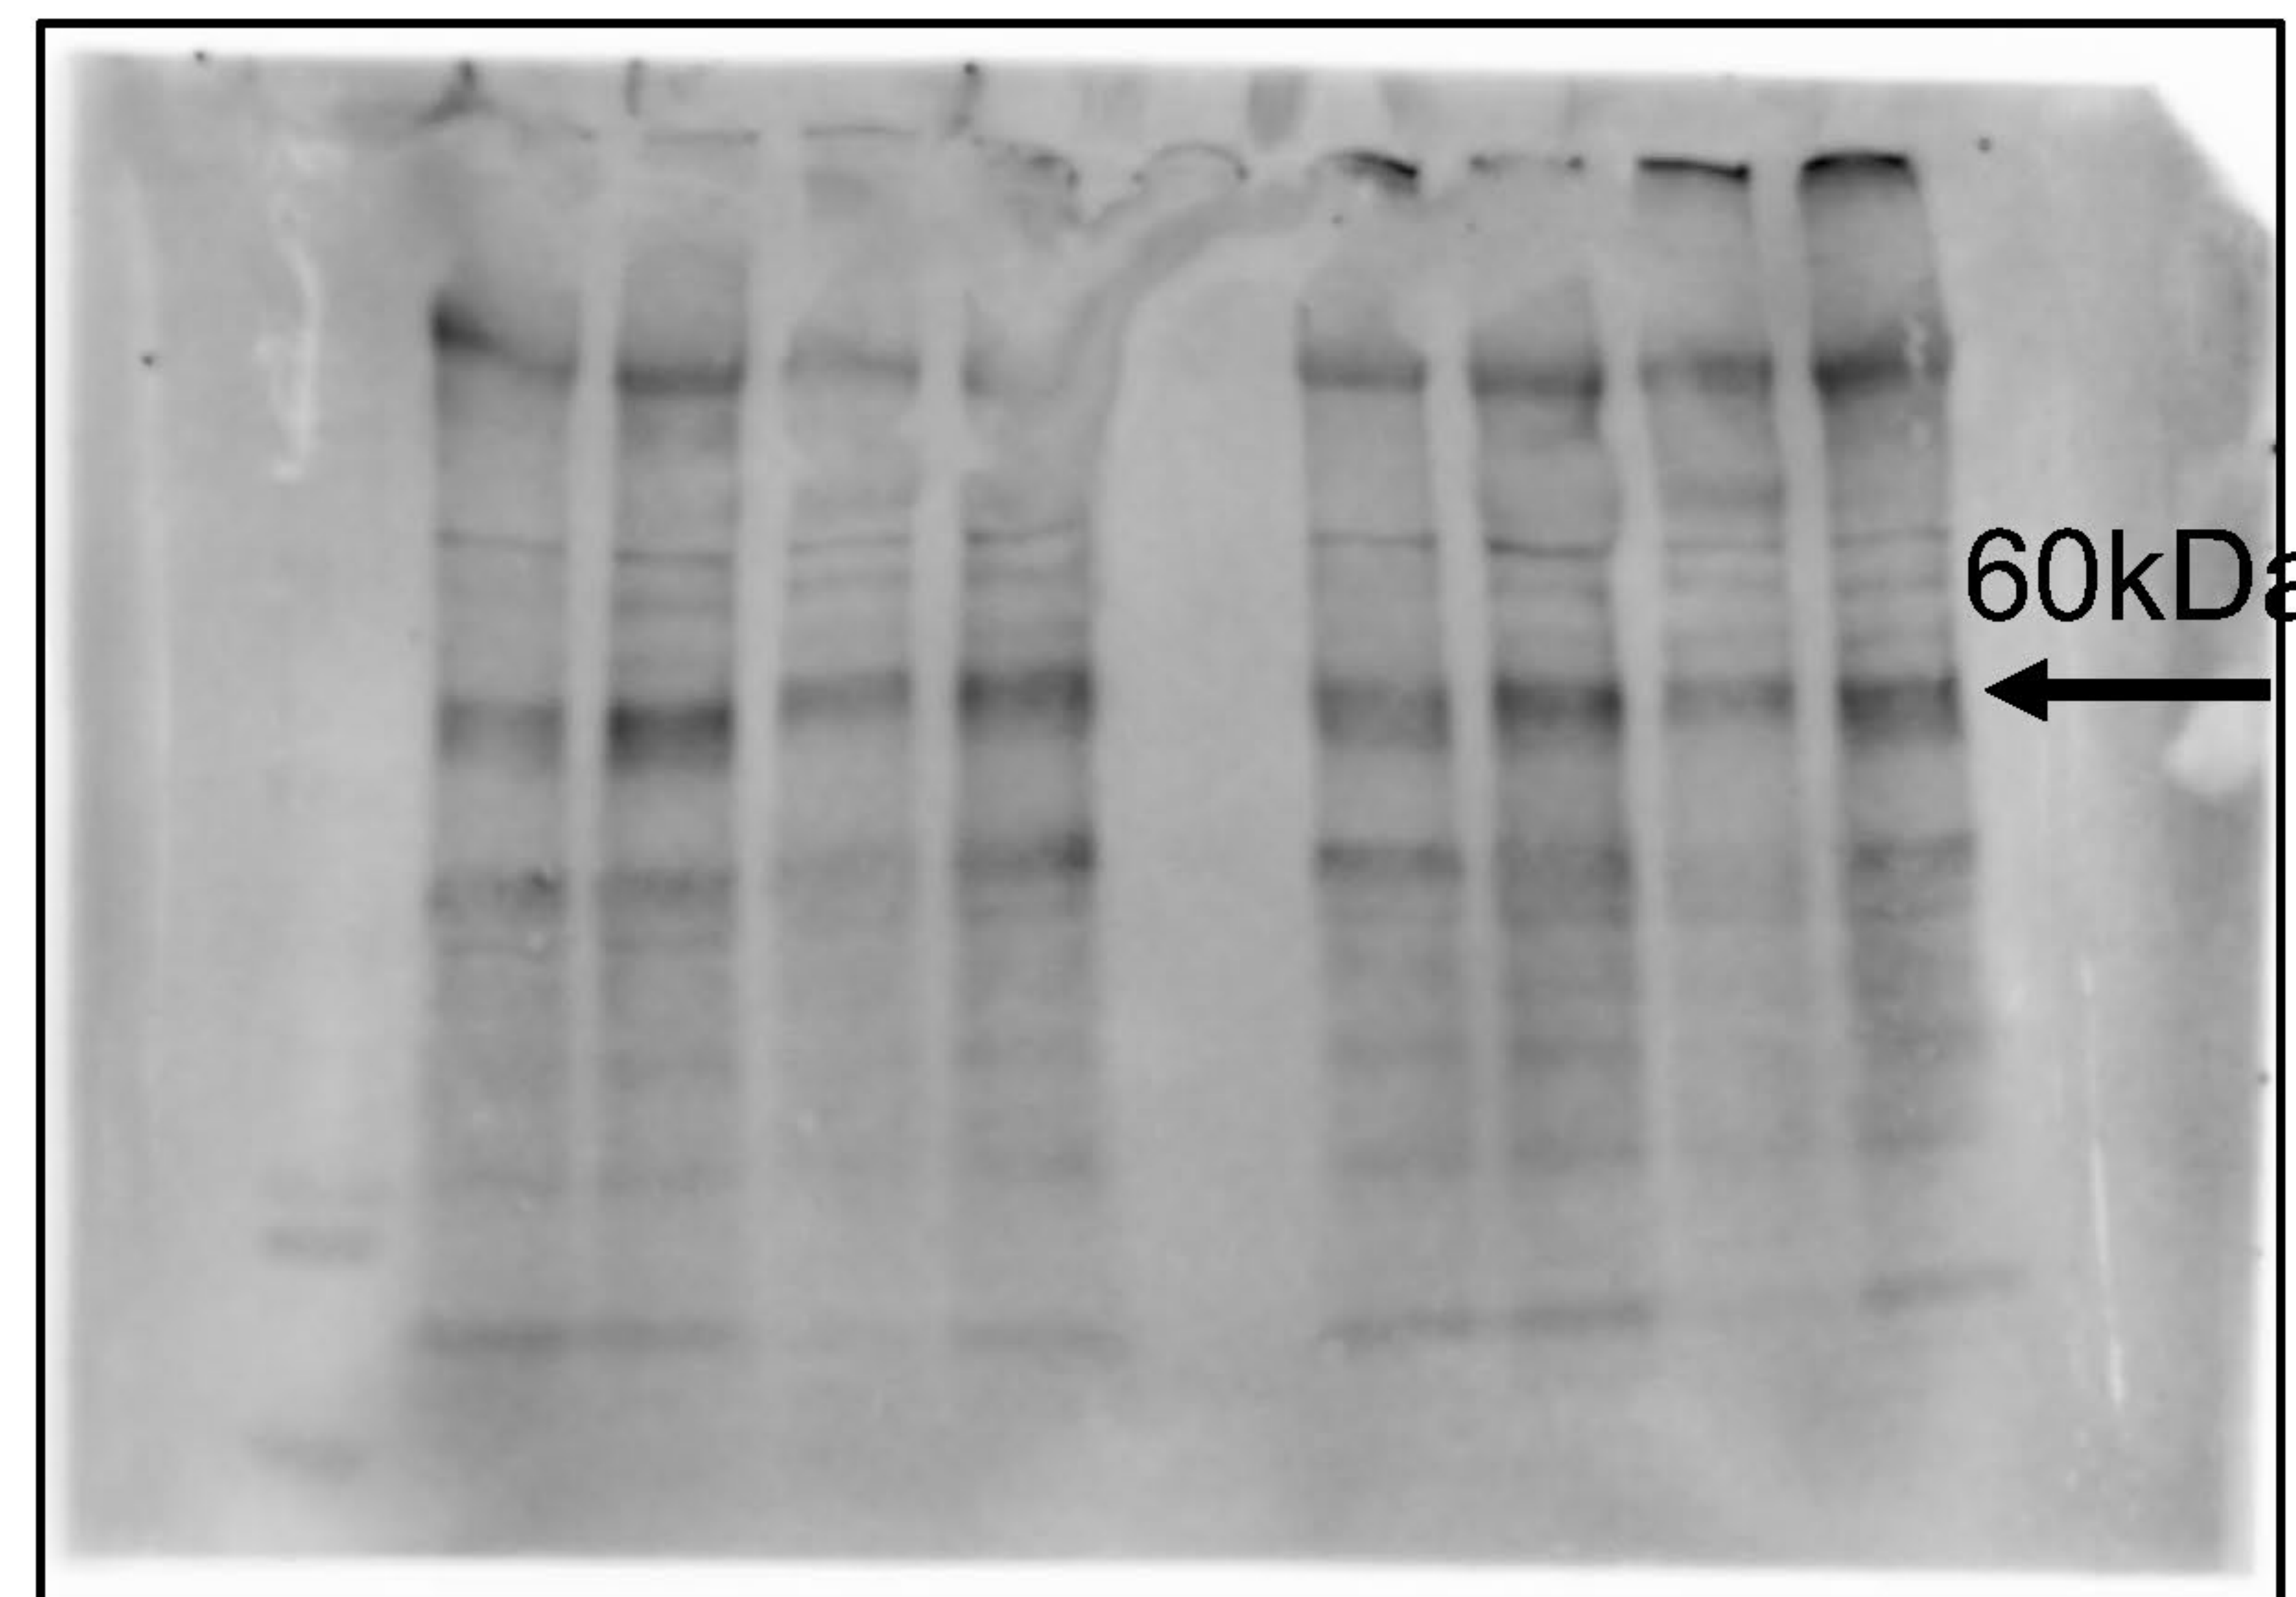

Supplement: 41536_2021_196_MOESM1_ESM.pdf [file 41536_2021_196_MOESM1_ESM.pdf]
